# Supplementary material for: Accuracy of a Self-Administered Online Cognitive Assessment in Detecting Amnestic Mild Cognitive Impairment
Source: Oxford University Press journal article supplement (doi:10.1093/geronb/gbab097), 2021-06-13

Accuracy of a Self-Administered Online Cognitive Assessment in Detecting Amnestic Mild  
Cognitive Impairment

**Supplementary Material**

Table S1. Cognitive and Psychosocial Tasks Administered.

| Test Title                                                                                               | Reference                          |
|----------------------------------------------------------------------------------------------------------|------------------------------------|
| Wechsler Abbreviated Scale of Intelligence<br><i>Vocabulary (split-half), Matrix Reasoning</i>           | Wechsler, 1999                     |
| Kaplan-Baycrest Neurocognitive Assessment<br><i>Spatial Location, Word Lists, Complex Figure, Clocks</i> | Leach et al., 2000                 |
| Wechsler Adult Intelligence Scale, Third Edition<br><i>Digit Symbol-coding</i>                           | Wechsler, 1997                     |
| Trail Making Test Parts A and B                                                                          | Army Individual Test Battery, 1944 |
| Delis-Kaplan Executive Function System<br><i>Color-Word Interference Test</i>                            | Delis et al., 2001                 |
| Wechsler Memory Scale-Revised<br><i>Logical Memory I and II (single story)</i>                           | Wechsler, 1987                     |
| Boston Naming Test                                                                                       | Kaplan et al., 2001                |
| Controlled Oral Word Association Test<br><i>Phonemic and Semantic Fluency</i>                            | Benton and Hamsher, 1976           |
| Patient Health Questionnaire-9                                                                           | Kroenke et al., 2001               |
| Generalized Anxiety Disorder Scale-7                                                                     | Spitzer et al., 2006               |
| Lawton and Brody Activities of Daily Living Questionnaire                                                | Lawton and Brody, 1969             |

Table S2. Single and Multiple Cut-Point Classifications for the Brain Health Assessment and Montreal Cognitive Assessment based on the Penalized Logistic Regression (PLR) Model.

|                                      | <b>Diagnostic Characteristic</b> | <b>Single Cut Point</b> | <b>Two Cut Points</b> |
|--------------------------------------|----------------------------------|-------------------------|-----------------------|
| <b>Brain Health Assessment</b>       |                                  |                         |                       |
|                                      | Cut point(s)*                    | .59                     | .48, .64              |
|                                      | Sensitivity                      | .57                     | .92                   |
|                                      | Specificity                      | .83                     | .93                   |
|                                      | Positive Predictive Value        | .81                     | .84                   |
|                                      | Negative Predictive Value        | .60                     | .81                   |
|                                      | Positive Likelihood Ratio        | 3.25                    | 4.18                  |
|                                      | Negative Likelihood Ratio        | 0.52                    | 0.19                  |
|                                      | Youden's J                       | .39                     |                       |
|                                      | Misclassification Error          | .32                     |                       |
| <b>Montreal Cognitive Assessment</b> |                                  |                         |                       |
|                                      | Cut point(s)*                    | .58                     | .37, .65              |
|                                      | Sensitivity                      | .65                     | .98                   |
|                                      | Specificity                      | .70                     | .95                   |
|                                      | Positive Predictive Value        | .73                     | .90                   |
|                                      | Negative Predictive Value        | .61                     | .86                   |
|                                      | Positive Likelihood Ratio        | 2.16                    | 7.06                  |
|                                      | Negative Likelihood Ratio        | 0.50                    | 0.13                  |
|                                      | Youden's J                       | .35                     |                       |
|                                      | Misclassification Error          | .33                     |                       |

\* Predicted probability of aMCI

Table S3A. Classification Statistics using a Single Cut-Point in Study Sample and Estimated in the Population for the Brain Health Assessment and Montreal Cognitive Assessment, based on the Penalized Logistic Regression (PLR) Model.

|                    | <b>Brain Health Assessment</b> |                     |                  |      | <b>Montreal Cognitive Assessment</b> |                  |      |
|--------------------|--------------------------------|---------------------|------------------|------|--------------------------------------|------------------|------|
|                    | <b>Probability of</b>          | <b>% Classified</b> | <b>Bootstrap</b> |      | <b>% Classified</b>                  | <b>Bootstrap</b> |      |
|                    | <b>aMCI</b>                    |                     | <b>95%CI</b>     |      |                                      | <b>95%CI</b>     |      |
| <b>Sample</b>      | Low                            | 60                  | 51.5             | 70.3 | 51                                   | 40.7             | 59.3 |
|                    | High                           | 40                  | 29.7             | 48.4 | 49                                   | 40.7             | 59.3 |
| <b>Population*</b> | Low                            | 79                  | 67.2             | 88.2 | 67                                   | 53.0             | 78.2 |
|                    | High                           | 21                  | 11.8             | 32.8 | 33                                   | 21.8             | 47.0 |

\*Population prevalence of aMCI is estimated at 10%. CI = Confidence Interval.

Table S3B. Classification Statistics using Two Cut-Points in Study Sample and Estimated in the Population for the Brain Health Assessment and Montreal Cognitive Assessment, based on the Penalized Logistic Regression (PLR) Model.

|                    | Brain Health Assessment |              |           | Montreal Cognitive Assessment |           |      |      |
|--------------------|-------------------------|--------------|-----------|-------------------------------|-----------|------|------|
|                    | Probability of          | % Classified | Bootstrap | % Classified                  | Bootstrap |      |      |
|                    | aMCI                    |              | 95%CI     |                               | 95%CI     |      |      |
| <b>Sample</b>      | Low                     | 23           | 15.4      | 30.8                          | 8         | 2.2  | 13.2 |
|                    | Indeterminate           | 56           | 46.2      | 67.0                          | 70        | 61.5 | 80.2 |
|                    | High                    | 21           | 13.2      | 28.6                          | 22        | 14.3 | 29.7 |
| <b>Population*</b> | Low                     | 39           | 25.4      | 52.6                          | 14        | 4.5  | 24.9 |
|                    | Indeterminate           | 51           | 36.9      | 66.5                          | 78        | 65.3 | 89.0 |
|                    | High                    | 10           | 2.9       | 18.7                          | 8         | 2.9  | 15.4 |

\*Population prevalence of aMCI is estimated at 10%. CI = Confidence Interval.

Table S4. Single and Multiple Cut-Point Classifications for the Brain Health Assessment and Montreal Cognitive Assessment based on the Logistic Regression (LR) Model.

|                                      | <b>Diagnostic Characteristic</b> | <b>Single Cut Point</b> | <b>Two Cut Points</b> |
|--------------------------------------|----------------------------------|-------------------------|-----------------------|
| <b>Brain Health Assessment</b>       |                                  |                         |                       |
|                                      | Cut point(s)*                    | .47                     | .35, .80              |
|                                      | Sensitivity                      | .80                     | .94                   |
|                                      | Specificity                      | .70                     | .95                   |
|                                      | Positive Predictive Value        | .77                     | .87                   |
|                                      | Negative Predictive Value        | .74                     | .79                   |
|                                      | Positive Likelihood Ratio        | 2.68                    | 5.10                  |
|                                      | Negative Likelihood Ratio        | .28                     | .21                   |
|                                      | Youden's J                       | .50                     |                       |
|                                      | Misclassification Error          | .24                     |                       |
| <b>Montreal Cognitive Assessment</b> |                                  |                         |                       |
|                                      | Cut point(s)*                    | .61                     | .41, .72              |
|                                      | Sensitivity                      | .47                     | .92                   |
|                                      | Specificity                      | .80                     | .98                   |
|                                      | Positive Predictive Value        | .75                     | .88                   |
|                                      | Negative Predictive Value        | .54                     | .71                   |
|                                      | Positive Likelihood Ratio        | 2.35                    | 5.49                  |
|                                      | Negative Likelihood Ratio        | .66                     | .31                   |
|                                      | Youden's J                       | .27                     |                       |
|                                      | Misclassification Error          | .39                     |                       |

\* Predicted probability of aMCI

Table S5A. Classification Statistics using a Single Cut-Point in Study Sample and Estimated in the Population for the Brain Health Assessment and Montreal Cognitive Assessment, based on the Logistic Regression (LR) Model.

|                    | Probability of<br>aMCI | Brain Health Assessment |           |      | Montreal Cognitive Assessment |           |      |
|--------------------|------------------------|-------------------------|-----------|------|-------------------------------|-----------|------|
|                    |                        | % Classified            | Bootstrap |      | % Classified                  | Bootstrap |      |
|                    |                        |                         | 95%CI     |      |                               | 95%CI     |      |
| <b>Sample</b>      | Low                    | 42                      | 24.0      | 50.5 | 65                            | 56.0      | 73.6 |
|                    | High                   | 58                      | 49.5      | 76.0 | 35                            | 26.4      | 44.0 |
| <b>Population*</b> | Low                    | 65                      | 52.0      | 76.9 | 77                            | 66.0      | 8.2  |
|                    | High                   | 35                      | 23.1      | 48.0 | 23                            | 12.7      | 34.0 |

\*Population prevalence of aMCI is estimated at 10%. CI = Confidence Interval.

Table S5B. Classification Statistics using Two Cut-Points in Study Sample and Estimated in the Population for the Brain Health Assessment and Montreal Cognitive Assessment, based on the Logistic Regression (LR) Model.

|                    | Brain Health Assessment |              |           | Montreal Cognitive Assessment |           |      |      |
|--------------------|-------------------------|--------------|-----------|-------------------------------|-----------|------|------|
|                    | Probability of          | % Classified | Bootstrap | % Classified                  | Bootstrap |      |      |
|                    | aMCI                    |              | 95%CI     |                               | 95%CI     |      |      |
| <b>Sample</b>      | Low                     | 15           | 8.8       | 23.1                          | 15        | 8.8  | 23.1 |
|                    | Indeterminate           | 68           | 59.3      | 77.5                          | 76        | 67.0 | 84.6 |
|                    | High                    | 17           | 8.8       | 23.6                          | 9         | 3.3  | 15.4 |
| <b>Population*</b> | Low                     | 25           | 13.9      | 37.1                          | 23        | 11.8 | 36.2 |
|                    | Indeterminate           | 68           | 54.3      | 79.3                          | 73        | 60.9 | 85.1 |
|                    | High                    | 7            | 2.0       | 14.2                          | 4         | 0.8  | 8.7  |

\*Population prevalence of aMCI is estimated at 10%. CI = Confidence Interval.

Table S6A. Variable List for Brain Health Assessment PLR Analysis

| <b>BHA Task</b>        | <b>Associated Variable</b>                                                                                      |
|------------------------|-----------------------------------------------------------------------------------------------------------------|
| Health Questionnaire   | lefthanded=(handedness ='L');                                                                                   |
| Health Questionnaire   | memoryconcerns2=(memory concerns='Yes');                                                                        |
| Health Questionnaire   | RelativeswithMemoryProblems2=(Relatives with Memory Problems='Yes');                                            |
| Health Questionnaire   | DepressionSadness2=input(substr(put(DepressionSadness,\$depression_nervous.),1,1),1.);                          |
| Health Questionnaire   | NervousWorried2=input(substr(put(NervousWorried,\$depression_nervous.),1,1),1.);                                |
| Spatial Working Memory | total clicks across all three trials                                                                            |
| Spatial Working Memory | number of clicks to complete trial 1                                                                            |
| Spatial Working Memory | number of clicks to complete trial 2                                                                            |
| Spatial Working Memory | number of clicks to complete trial 3                                                                            |
| Spatial Working Memory | total RT across ALL 3 trials                                                                                    |
| Spatial Working Memory | total accuracy across ALL 3 trials                                                                              |
| Spatial Working Memory | total clicks to complete trial across ALL 3 trials                                                              |
| Spatial Working Memory | total errors across ALL 3 trials                                                                                |
| Spatial Working Memory | difference in number of clicks to complete trial 2 vs. trial 1                                                  |
| Spatial Working Memory | difference in number of clicks to complete trial 3 vs. trial 2                                                  |
| Spatial Working Memory | difference in number of clicks to complete trial 3 vs. trial 1                                                  |
| Spatial Working Memory | difference in number of errors in trial 2 vs. trial 1                                                           |
| Spatial Working Memory | difference in number of errors in trial 3 vs. trial 2                                                           |
| Spatial Working Memory | difference in number of errors in trial 3 vs. trial 1                                                           |
| Spatial Working Memory | total RT across ALL 3 trials for truncated                                                                      |
| Spatial Working Memory | total clicks to complete trial across ALL 3 trials for truncated                                                |
| Spatial Working Memory | total accuracy across ALL 3 trials for truncated                                                                |
| Spatial Working Memory | total errors across ALL 3 trials for truncated                                                                  |
| Spatial Working Memory | difference in number of clicks to complete trial 2 vs. trial 1 (truncated to remove guesses before 1st correct) |
| Spatial Working Memory | difference in number of errors in trial 2 vs. trial 1 (truncated to remove guesses before 1st correct)          |
| Spatial Working Memory | difference in number of clicks to complete trial 3 vs. trial 2 for truncated                                    |
| Spatial Working Memory | difference in number of clicks to complete trial 3 vs. trial 1 for truncated                                    |
| Spatial Working Memory | difference in number of errors in trial 3 vs. trial 2 for truncated                                             |
| Spatial Working Memory | difference in number of errors in trial 3 vs. trial 1 for truncated                                             |



---

|                        |                                                                                       |
|------------------------|---------------------------------------------------------------------------------------|
| Spatial Working Memory | Trial 1 total RT                                                                      |
| Spatial Working Memory | Trial 1 total clicks to complete trial                                                |
| Spatial Working Memory | Trial 1 total accuracy across trial                                                   |
| Spatial Working Memory | Trial 1 total errors across trial                                                     |
| Spatial Working Memory | Trial 2 total RT                                                                      |
| Spatial Working Memory | Trial 2 total clicks to complete trial                                                |
| Spatial Working Memory | Trial 2 total accuracy across trial                                                   |
| Spatial Working Memory | Trial 2 total errors across trial                                                     |
| Spatial Working Memory | Trial 3 total RT                                                                      |
| Spatial Working Memory | Trial 3 total clicks to complete trial                                                |
| Spatial Working Memory | Trial 3 total accuracy across trial                                                   |
| Spatial Working Memory | Trial 3 total errors across trial                                                     |
| Spatial Working Memory | Trial 1 total RT truncated score (truncated to remove guesses before 1st correct)     |
| Spatial Working Memory | Trial 1 total clicks in trial (for calculation of truncated number of clicks)         |
| Spatial Working Memory | Trial 1 first click after truncated                                                   |
| Spatial Working Memory | Trial 1 total accuracy (truncated)                                                    |
| Spatial Working Memory | Trial 1 total clicks truncated score (truncated to remove guesses before 1st correct) |
| Spatial Working Memory | Trial 1 total errors truncated score (truncated to remove guesses before 1st correct) |
| Spatial Working Memory | Trial 2 total RT truncated score (truncated to remove guesses before 1st correct)     |
| Spatial Working Memory | Trial 2 total clicks in trial (for calculation of truncated number of clicks)         |
| Spatial Working Memory | Trial 2 first click after truncated                                                   |
| Spatial Working Memory | Trial 2 total accuracy (truncated)                                                    |
| Spatial Working Memory | Trial 2 total clicks truncated score (truncated to remove guesses before 1st correct) |
| Spatial Working Memory | Trial 2 total errors truncated score (truncated to remove guesses before 1st correct) |
| Spatial Working Memory | Trial 3 total RT truncated score (truncated to remove guesses before 1st correct)     |
| Spatial Working Memory | Trial 3 total clicks in trial                                                         |
| Spatial Working Memory | Trial 3 first click after truncated                                                   |
| Spatial Working Memory | Trial 3 total accuracy (truncated)                                                    |
| Spatial Working Memory | Trial 3 total clicks truncated score (truncated to remove guesses before 1st correct) |
| Spatial Working Memory | Trial 3 total errors truncated score (truncated to remove guesses before 1st correct) |
| Stroop Interference    | Median RT                                                                             |
| Stroop Interference    | RT total all trials                                                                   |

---

---

|                     |                                                                                                 |
|---------------------|-------------------------------------------------------------------------------------------------|
| Stroop Interference | sigma (SD) RT congruent trials                                                                  |
| Stroop Interference | sigma (SD) RT incongruent trials                                                                |
| Stroop Interference | sigma (SD) RT neutral trials                                                                    |
| Stroop Interference | sigma RT for incongruent trials minus sigma RT for congruent trials                             |
| Stroop Interference | sigma RT for incongruent trials minus sigma RT for neutral trials                               |
| Stroop Interference | sigma RT for congruent trials minus sigma RT for neutral trials                                 |
| Stroop Interference | median RT incongruent trials                                                                    |
| Stroop Interference | median RT congruent trials                                                                      |
| Stroop Interference | median RT neutral trials                                                                        |
| Stroop Interference | median RT for incongruent trials minus median RT for congruent trials                           |
| Stroop Interference | median RT for incongruent trials minus median RT for neutral trials                             |
| Stroop Interference | median RT for congruent trials minus median RT for neutral trials                               |
| Stroop Interference | median RT incongruent trials - 1st half of trials only                                          |
| Stroop Interference | median RT congruent trials - 1st half of trials only                                            |
| Stroop Interference | median RT neutral trials - 1st half of trials only                                              |
| Stroop Interference | RT total all trials - 1st half of trials only                                                   |
| Stroop Interference | median RT for incongruent trials minus median RT for congruent trials - 1st half of trials only |
| Stroop Interference | median RT for incongruent trials minus median RT for neutral trials - 1st half of trials only   |
| Stroop Interference | median RT for congruent trials minus median RT for neutral trials - 1st half of trials only     |
| Stroop Interference | median RT incongruent trials - 2nd half of trials only                                          |
| Stroop Interference | median RT congruent trials - 2nd half of trials only                                            |
| Stroop Interference | median RT neutral trials - 2nd half of trials only                                              |
| Stroop Interference | RT total all trials - 2nd half of trials only                                                   |
| Stroop Interference | median RT for incongruent trials minus median RT for congruent trials - 2nd half of trials only |
| Stroop Interference | median RT for incongruent trials minus median RT for neutral trials - 2nd half of trials only   |
| Stroop Interference | median RT for congruent trials minus median RT for neutral trials - 2nd half of trials only     |
| Stroop Interference | Percent Accuracy - congruent trials                                                             |
| Stroop Interference | Percent Accuracy - incongruent trials                                                           |
| Stroop Interference | Percent Accuracy - neutral trials                                                               |
| Stroop Interference | Percent Accuracy - congruent trials - 1st half of trials only                                   |
| Stroop Interference | Percent Accuracy - incongruent trials - 1st half of trials only                                 |
| Stroop Interference | Percent Accuracy - neutral trials - 1st half of trials only                                     |

---

---

|                           |                                                                                            |
|---------------------------|--------------------------------------------------------------------------------------------|
| Stroop Interference       | Percent Accuracy - congruent trials - 2nd half of trials only                              |
| Stroop Interference       | Percent Accuracy - incongruent trials - 2nd half of trials only                            |
| Stroop Interference       | Percent Accuracy - neutral trials - 2nd half of trials only                                |
| Stroop Interference       | median RT congruent trials - Accurate trials only                                          |
| Stroop Interference       | median RT incongruent trials - Accurate trials only                                        |
| Stroop Interference       | median RT neutral - Accurate trials only                                                   |
| Stroop Interference       | median RT congruent trials - 1st half of trials only - Accurate trials only                |
| Stroop Interference       | median RT incongruent trials - 1st half of trials only - Accurate trials only              |
| Stroop Interference       | median RT neutral trials - 1st half of trials only - Accurate trials only                  |
| Stroop Interference       | median RT congruent trials - 2nd half of trials only - Accurate trials only                |
| Stroop Interference       | median RT incongruent trials - 2nd half of trials only - Accurate trials only              |
| Stroop Interference       | median RT neutral trials - 2nd half of trials only - Accurate trials only                  |
| Stroop Interference       | Trial RT 85th percentile-congruent                                                         |
| Stroop Interference       | Trial RT 85th percentile-incongruent                                                       |
| Stroop Interference       | Trial RT 85th percentile-neutral                                                           |
| Face-Name Association     | % accuracy                                                                                 |
| Face-Name Association     | ratio of correct to total responses                                                        |
| Face-Name Association     | Total Hits (correct positive response)                                                     |
| Face-Name Association     | Total Correct rejections (correct negative response)                                       |
| Face-Name Association     | Total False Alarms (incorrect positive response)                                           |
| Face-Name Association     | Total Misses (incorrect negative response)                                                 |
| Face-Name Association     | Total RT for test                                                                          |
| Face-Name Association     | Median RT for test                                                                         |
| Letter-Number Alternation | total RT in seconds                                                                        |
| Letter-Number Alternation | Total RT                                                                                   |
| Letter-Number Alternation | % accuracy (2nd part only - clicks 9 through end of test)                                  |
| Letter-Number Alternation | number of clicks to complete trial (no cap, no scale, theoretic infinite max)              |
| Letter-Number Alternation | % accuracy of clicks over whole trial (similar to number of clicks, but on a scale 0-100%) |
| Letter-Number Alternation | % accuracy of clicks - 1st 8 clicks only                                                   |
| Letter-Number Alternation | number of clicks to complete 2nd half of test (total number of clicks - 8)                 |

---

Table S6B. Variable List for Montreal Cognitive Assessment PLR Analysis

| <b>BHA Task</b>                      | <b>Associated Variable</b>                                               |
|--------------------------------------|--------------------------------------------------------------------------|
| Visuoconstruction/Executive Function | Visual/Executive subscore (out of 5)                                     |
| Naming                               | Naming score (out of 3)                                                  |
| Attention                            | Digits score (out of 2)                                                  |
| Attention                            | letter tapping score (out of 1)                                          |
| Attention                            | serial 7s score (out of 3)                                               |
| Attention                            | Attention subscore - sum of Digits, Letter Tapping, Serial 7s (out of 6) |
| Language                             | sentence repetition score (out of 2)                                     |
| Language                             | phonemic fluency score (out of 1)                                        |
| Language                             | Language subscore - sentence repetition, phonemic fluency (out of 3)     |
| Abstractions                         | abstraction score (out of 2)                                             |
| Delayed Recall                       | delayed recall score (out of 5)                                          |
| Orientation                          | Orientation score (out of 6)                                             |

Figure S1. BHA and MoCA -  $P(D|T+)$  and  $P(D|T-)$  versus prevalence of aMCI in the population.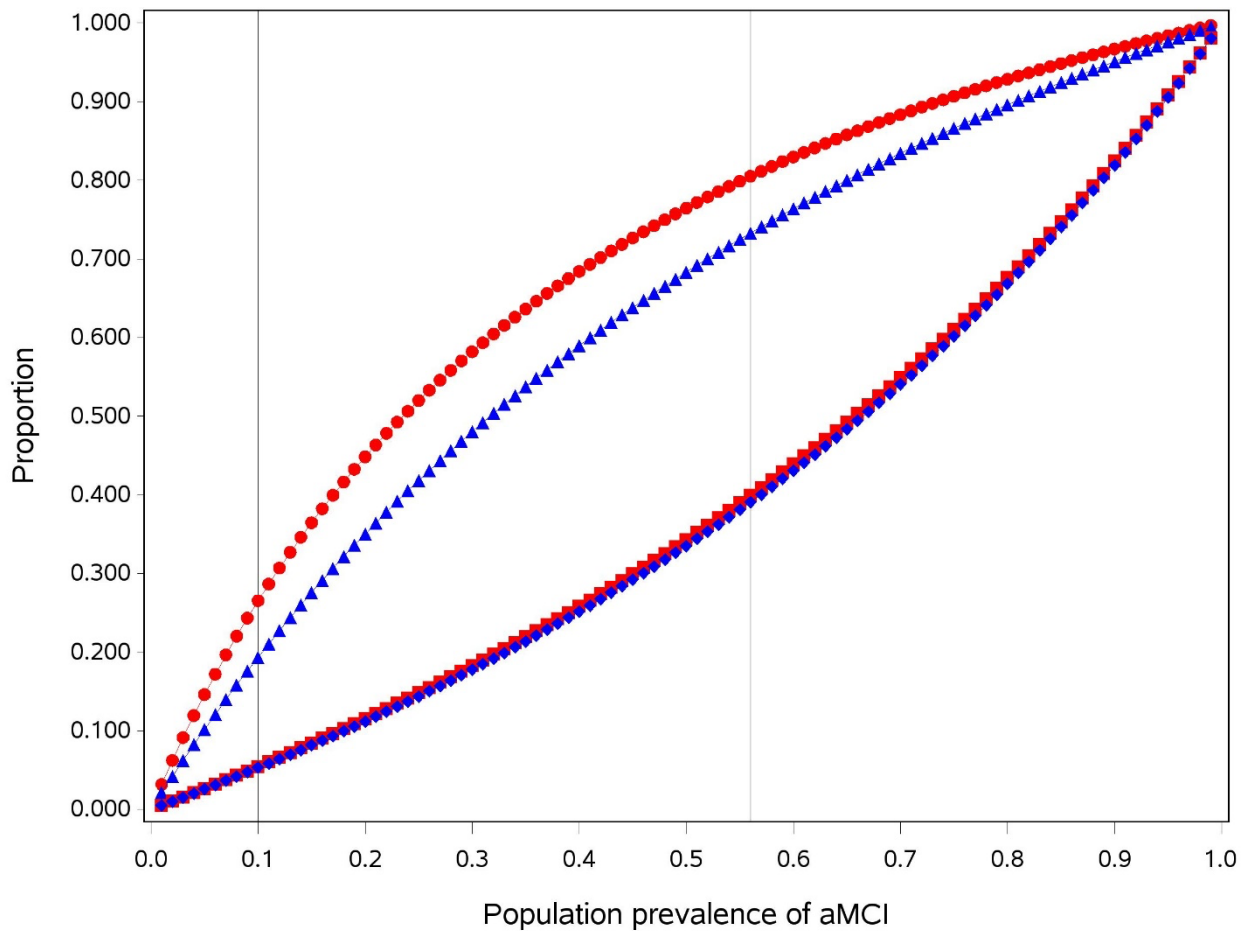

The BHA  $P(D|T+)$  (red dots) is higher than the MoCA  $P(D|T+)$  (blue triangles) for most of the range of population prevalence of aMCI. However the BHA  $P(D|T-)$  (red squares) is similar to the MoCA  $P(D|T-)$  (blue diamonds). The vertical bars at 0.10 and 0.56 are located at the estimated population prevalence and the sample prevalence, respectively. See Tables S2 for additional summaries related to these prevalence values.

Figure S2. Rule In (Sensitivity) and Rule Out (Specificity) Plots Comparing PLR Model Two Cut Point Solutions for the BHA (Red) and MoCA (Blue).

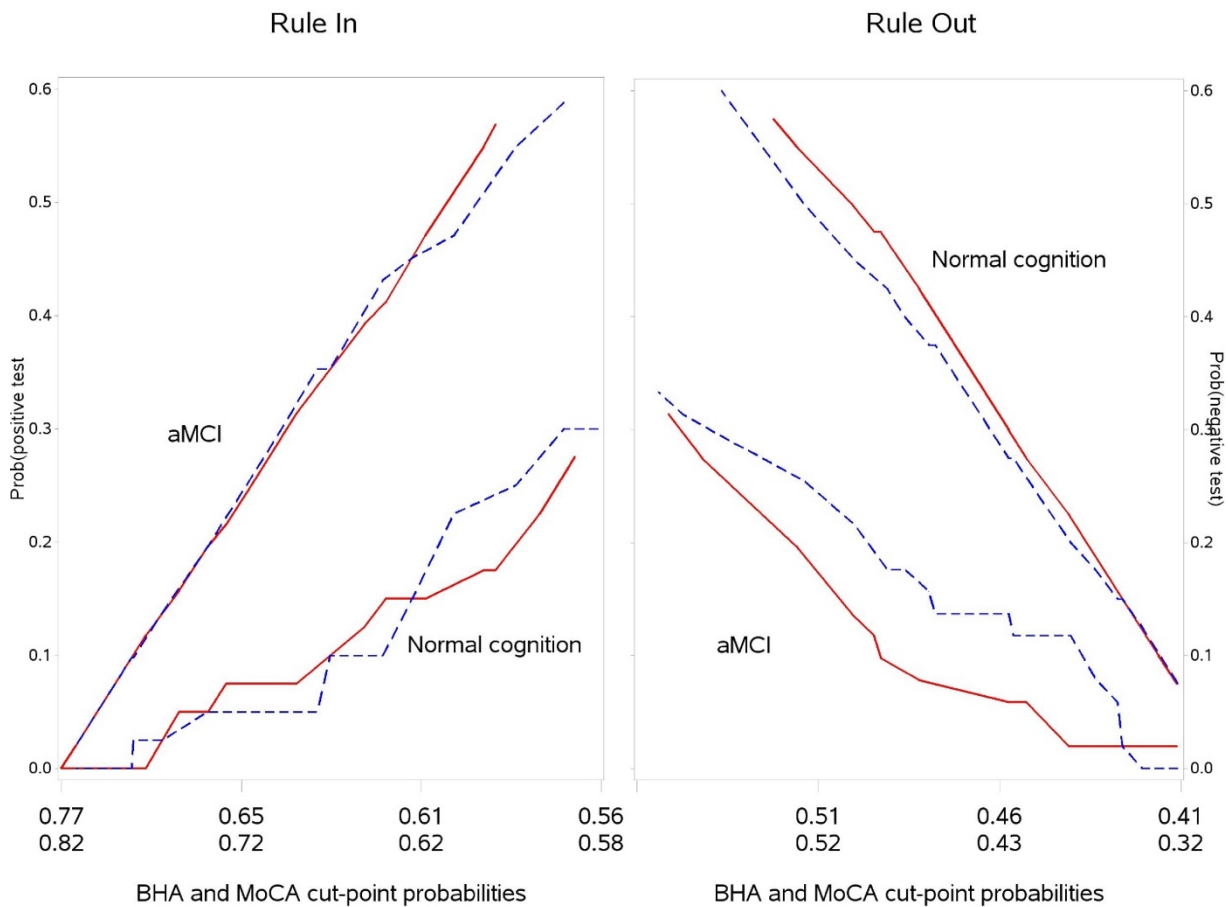

Functions of sensitivity and specificity are plotted for the BHA (red) and MoCA PLR models. The upper lines in the Rule In panel are sensitivity (ruling in the aMCI group) and the lower lines are 1-specificity (ruling in the normal cognition group). The upper lines of the Rule Out panel are specificity (ruling out the normal cognition group), and the lower lines are 1-sensitivity (ruling out the aMCI group). For both the Rule In and Rule Out panels the x-axis was calculated in polar co-ordinates (the angle in radians of arctan of sensitivity/specificity) after varying the single cut-point probabilities. The x-axis is labeled with these cut-point probabilities.

The two models are similar in ruling in the aMCI and normal cognition groups. But the BHA performs better at ruling out these groups. (See also single cut point specificities in Tables S2).

Figure S3. Scatterplots of BHA Subtests and Traditional Neuropsychological Measures of Similar Constructs.

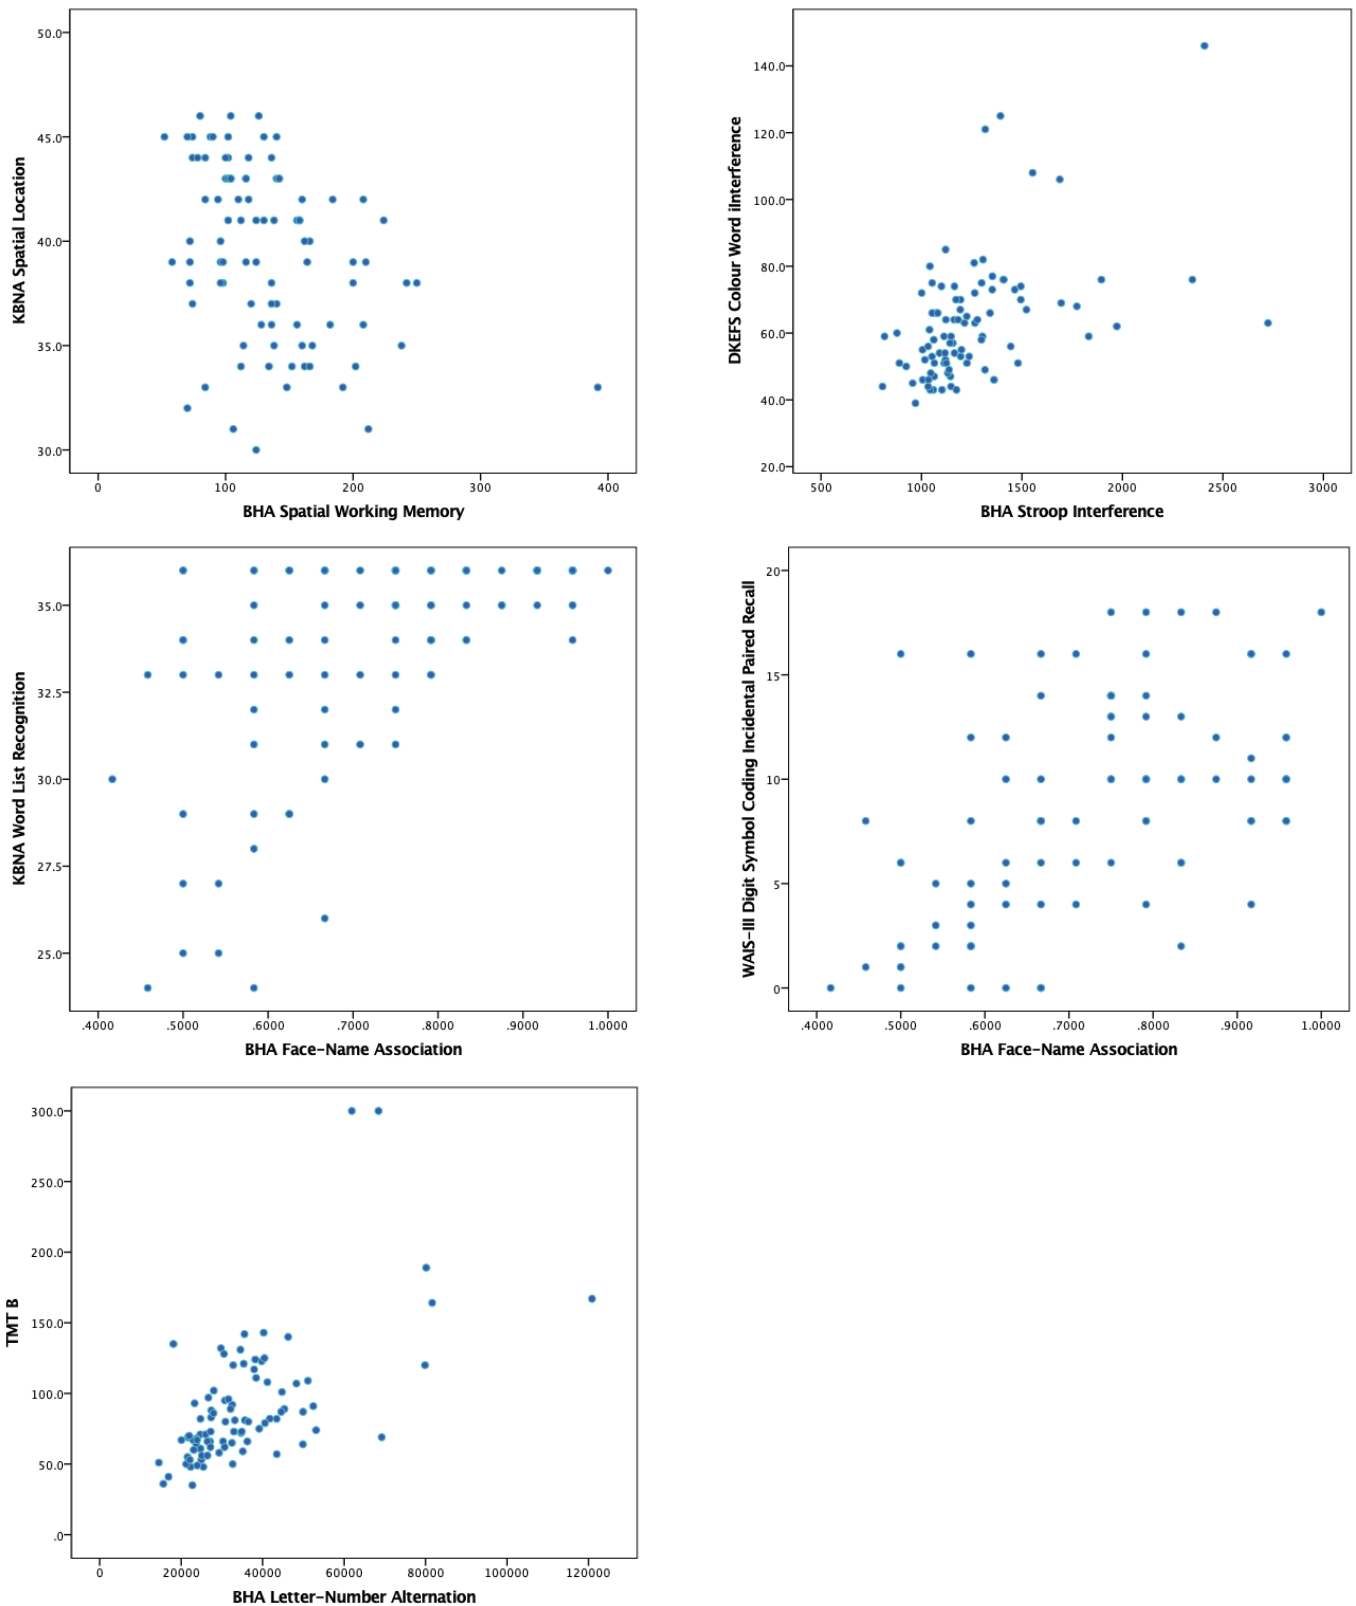

Supplement: gbab097_suppl_supplementary_material.pdf [file gbab097_suppl_supplementary_material.pdf]
